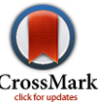

# Proteomic Analysis of Mesenchymal Stem Cells from Normal and Deep Carious Dental Pulp

Dandan Ma<sup>1,2</sup>✉, Li Cui<sup>1,2</sup>✉, Jie Gao<sup>1,2</sup>, Wenjuan Yan<sup>1,2</sup>, Ying Liu<sup>1,2</sup>, Shuamei Xu<sup>1,2</sup>, Buling Wu<sup>1,2\*</sup>

**1** Department of Stomatology, Nanfang Hospital, Guangzhou, P.R. China, **2** College of Stomatology, Southern Medical University, Guangzhou, P.R. China

## Abstract

Dental pulp stem cells (DPSCs), precursor cells of odontoblasts, are ideal seed cells for tooth tissue engineering and regeneration. Our previous study has demonstrated that stem cells exist in dental pulp with deep caries and are called carious dental pulp stem cells (CDPSCs). The results indicated that CDPSCs had a higher proliferative and stronger osteogenic differentiation potential than DPSCs. However, the molecular mechanisms responsible for the biological differences between DPSCs and CDPSCs are poorly understood. The aim of this study was to define the molecular features of DPSCs and CDPSCs by comparing the proteomic profiles using two-dimensional fluorescence difference gel electrophoresis (2-D DIGE) in combination with matrix-assisted laser desorption ionization time-of-flight mass spectrometry (MALDI-TOF MS). Our results revealed that there were 18 protein spots differentially expressed between DPSCs and CDPSCs in a narrow pH range of 4 to 7. These differently expressed proteins are mostly involved in the regulation of cell proliferation, differentiation, cell cytoskeleton and motility. In addition, our results suggested that CDPSCs had a higher expression of antioxidative proteins that might protect CDPSCs from oxidative stress. This study explores some potential proteins responsible for the biological differences between DPSCs and CDPSCs and expands our understanding on the molecular mechanisms of mineralization of DPSCs in the formation of the dentin-pulp complex.

**Citation:** Ma D, Cui L, Gao J, Yan W, Liu Y, et al. (2014) Proteomic Analysis of Mesenchymal Stem Cells from Normal and Deep Carious Dental Pulp. PLoS ONE 9(5): e97026. doi:10.1371/journal.pone.0097026

**Editor:** Pranela Rameshwar, Rutgers - New Jersey Medical School, United States of America

**Received:** February 20, 2014; **Accepted:** April 14, 2014; **Published:** May 8, 2014

**Copyright:** © 2014 Ma et al. This is an open-access article distributed under the terms of the Creative Commons Attribution License, which permits unrestricted use, distribution, and reproduction in any medium, provided the original author and source are credited.

**Funding:** This study was supported by National Natural Science Foundation of China (China, 81371137). The funders had no role in study design, data collection and analysis, decision to publish, or preparation of the manuscript.

**Competing Interests:** The authors have declared that no competing interest exist.

\* E-mail: bulingwu1958@163.com

✉ These authors contributed equally to this work.

## Introduction

Human dental stem cells are generally applied in tissue and organ regeneration; however, the regenerative application of these stem cells in dental therapy remains problematic [1]. To date, five types of human dental stem cells have been isolated and characterized: dental pulp stem cells (DPSCs) [2], [3], stem cells from exfoliated deciduous teeth (SHED) [4], stem cells from apical papilla (SCAP) [5], dental follicle stem cells (DFSCs) [6] and periodontal ligament stem cells (PDLSCs) [7], [8].

DPSCs, which are ideal seed cells for tooth tissue regeneration, can differentiate into functional odontoblasts *in vivo* when the tooth encounters external mild stimuli such as carious lesion, attrition and abrasion. The reactionary and reparative dentin formed by surviving odontoblasts and newly differentiated odontoblast-like cells protect the pulp from further damage. Our previous study has indicated that stem cells exist in carious pulp and are named carious dental pulp stem cells (CDPSCs). CDPSCs displayed an increased proliferative capacity and enhanced alkaline phosphatase (ALP) activity, mineralization ability, and the expression of osteogenesis/dentinogenesis-related genes compared with DPSCs [9]. Though the biological characteristics of these two stem cells have been well analyzed, the molecular mechanisms responsible for the biological differences between CDPSCs and DPSCs are still unclear.

Mass spectroscopy (MS) based proteomics is becoming an efficient method characterized by systematic large-scale qualitative and quantitative mapping of the whole proteome of stem cell phenotypes from different niches, allowing for the rapid understanding the mechanisms that control their self-renewal ability, differentiation potential and regeneration capacity [10], [11].

Previous studies compared the protein expression profiles in mesenchymal stem cells derived from human periodontal ligament, dental pulp, dental follicle, and dental papilla to provide a database for proteins commonly or differentially expressed among various dental stem cell populations [12], [13], [14]. Recently Pivoriūnas A et al. analyzed the proteomic profiling of SHED to reveal the abundantly expressed proteins [15].

In this work, we performed two-dimensional fluorescence difference gel electrophoresis (2-D DIGE) in combination with matrix-assisted laser desorption ionization time-of-flight mass spectrometry (MALDI-TOF MS) to identify the differentially expressed proteins between DPSCs and CDPSCs and to explore the candidate molecular markers contributing to the regeneration of dental structures in stem cell-based tissue engineering protocols.

## Materials and Methods

### Cell Culture and Identification

All patient-related procedures (patients were 18–20 years of age) used in this study were approved by the Medical Ethics Committee

of Nanfang Hospital, and written informed consent was obtained from all subjects. Normal pulp tissues were collected from freshly extracted third molars without caries or pulpal diseases ( $n = 10$ ). Carious pulp tissues were obtained from wisdom teeth diagnosed with deep caries ( $n = 10$ ). The diagnosis of deep caries was determined by endodontic specialists according to clinical assessment. Inclusion criteria were the following: carious lesion depth was 80% or more of the dentine thickness assessed radiographically and the presence of a clear radiodense area between the carious lesion and the pulp. The thickness of the remaining dentin was less than 2 mm. Exclusion criteria were: prolonged intense pain, spontaneous pain, and/or pain disturbing a full night's sleep; apical radiolucency; negative response to thermal and electric pulp testing. All pulp tissues were minced and then digested with 3 mg/mL collagenase type I (Invitrogen Life Technology, Carlsbad, CA, USA) and 4 mg/mL dispase (Sigma, St Louis, MO, USA) for 1 h at 37°C. Single-cell suspensions were obtained by passing the digested tissues through a 70- $\mu$ m cell strainer (Carrigtwohill Co, Cork, Ireland). The cells were seeded into 6-well plates (Costar, Cambridge, MA, USA) with Dulbecco's modified Eagle medium (Gibco, Life Technologies, Grand Island, NY, USA) containing 15% fetal bovine serum, 100 units/mL penicillin, 100 mg/mL streptomycin, and 50 mg/mL ascorbic acid and then incubated at 37°C in 5% CO<sub>2</sub>. Stem cells obtained from normal pulp tissues were called DPSCs, and those from carious pulp tissues were called CDPSCs. DPSCs and CDPSCs were enriched by collecting multiple colonies.

### Scanning Electron Microscope Study

DPSCs and CDPSCs at passage 3 were used for the study. The samples were prefixed at 4°C in 2.5% glutaraldehyde overnight and post-fixed in 1% OsO<sub>4</sub> for 2 h at room temperature (RT). They were dehydrated in gradual increased concentration of ethanol and then critical point dried. The samples were observed under a scanning electron microscope (XL 30 ESEM, Philips Electron Optics, Eindhoven, The Netherlands).

### Cell Counting Assay

Following 24 h serum starvation, DPSCs and CDPSCs were seeded at  $2 \times 10^4$  in 1 mL medium per well of a 24-well plate for the cell counting assay. The cell growth medium was replaced every two days. At the indicated time points, cell proliferation was analyzed by counting cells using trypan blue for exclusion of dead cells. The assay was repeated in triplicate.

### In vitro Analysis of Multilineage Differentiation of DPSCs and CDPSCs

For osteogenic differentiation, DPSCs and CDPSCs were seeded in 2 mL complete culture medium at  $3 \times 10^4/35$  mm plate and cultured to 70% confluence. Differentiation was induced by culturing cells in complete medium supplemented with 10 mM  $\beta$ -glycerol phosphate, 50  $\mu$ g/mL ascorbic acid, and  $10^{-7}$  M dexamethasone for 3 weeks. The induced cells were fixed in 70% ice-cold ethanol for 20 min at RT and then stained with 2% alizarin red S. For adipogenic differentiation, DPSCs and CDPSCs were seeded into 24-well plates at a density of  $1 \times 10^4$ /well and cultured to 70% confluence. Differentiation was induced by culturing cells in complete medium supplemented with 0.5 mM methylisobutylxanthine, 0.5 mM hydrocortisone, and 60 mM indomethacin for 3 weeks. The cells were fixed in 4% paraformaldehyde (PFA) for 20 min at RT and then stained with oil red O. For chondrogenic differentiation, DPSCs and CDPSCs were prepared as described for adipogenic differentiation. The

cells were incubated with 50  $\mu$ g/mL ascorbic acid, 1% insulin-transferrin-selenous acid, 100 mg/mL sodium pyruvate, 40  $\mu$ g/mL L-proline and 10  $\mu$ g/L transforming growth factor-3 for 3 weeks. Finally, the cells were then fixed in 4% PFA for 20 min at RT and then stained with alcian blue.

### Protein Determination and 2D-DIGE

Samples for DPSCs and CDPSCs were centrifuged at 1,200 g and washed in ice-cold PBS three times. Total proteins were extracted from cells with 500  $\mu$ L of lysis buffer (7 M urea, 4% CHAPS, 20 mM Tris, 2 M Thiourea and 2 mM TBP) and a mixture of protease inhibitors. The extraction mixture was sonicated three times for 20 s with 40% amplitude by using U200S sonicator (IKA Labortechnik, Germany) and then centrifuged at 15,000 g for 1 h at 4°C. The Bradford assay was performed to determine the protein content of DPSCs and CDPSCs. All samples were stored at  $-80^\circ\text{C}$  prior to electrophoresis. 2D-DIGE was performed according to the manufacturer's protocol (CyDye DIGE Fluor minimal dyes, GE Healthcare) with minor modifications outlined below. For IEF, samples were labeled with three Cy-Dye DIGE fluors (Cy2, Cy3 and Cy5). A total of 50  $\mu$ g of protein sample was labeled with 400 pmol of Cy3 or Cy5. Cy2 was used to label two mixed samples as an internal reference standard. The samples were vortexed briefly and incubated on ice for 30 min in the dark. Reactions were quenched by the addition of 1 mL of 10 mM lysine and incubated for 10 min on ice under dark conditions. The labeled samples were pooled and mixed with rehydration buffer (7 M urea, 2 M thiourea, 4% CHAPS, 40 mM DTT, 0.00004% bromphenol blue and 0.2% IEF buffer) to a final volume of 450  $\mu$ L. To ensure an optimal focusing of the proteins, an ampholyte solution for pH 4–7 (Serva, Heidelberg, Germany) was added in a concentration of 1% and the samples were loaded onto Immobiline Dry Strips (IPG, 24 cm, linear pH gradient from pH 4–7, GE Healthcare) by rehydration for 20 h at RT in darkness. The strips were rehydrated and focused with the following parameters: 150 V for 1 h and 250 V for 1 h, respectively; then 1 h at 500 V, 1 h at 1000 V, 5000 V for 3 h by gradient; finally 10000 V for 4 h by step and hold until a total amount of 70000 Vh was obtained with a current limit of 50  $\mu$ A/gel. Subsequent to IEF, the strips were equilibrated with 10 mg/mL DTT and 40 mg/mL iodoacetamide for 15 min in equilibration buffer containing 6 M urea, 30% glycerol, 2% SDS, and 75 mM Tris-HCl (pH 8.8). Gels were run in Laemmli electrophoresis running buffer (250 mM Tris base, 1.92 M glycine and 1% SDS) and sealed on the borderline of the SDS-PAGE gel by using 0.5% low-melting point agarose gel. Protein spots were separated in 12.5% SDS-polyacrylamide gels at 2 W/gel for 1 h at 16°C and then 17 W/gel at 10°C until the bromophenol blue dye reached the end of the gel. The biological triplicates were run on three gels as analytical gels.

### Image Scanning and Analysis

Three different gel images were performed from one gel at the appropriate wavelengths. They are Cy2 (blue 488 nm laser and 520 nm band pass emission filter), Cy3 (green 532 nm laser and 580 nm band pass emission filter) and Cy5 (red 633 nm laser and 670 nm band pass emission filter) by using a Typhoon 9410 scanner (GE Healthcare) to generate eighteen protein spot maps. DeCyder 5.0 software (GE Healthcare) was used for 2D-DIGE analysis according to the manufacturer's recommendation. The DeCyder differential in-gel analysis (DIA) module was used for pairwise comparisons of each sample with the internal standard in each gel. The DeCyder biological variation analysis (BVA) module was then used to simultaneously match all nine protein spot maps,

using the Cy3/Cy2 and Cy5/Cy2 DIA ratios, to calculate average abundance changes. Student's *t*-test was used to calculate significant differences in relative abundances of protein spot features in DPSCs compared with CDPSCs. The differential protein spots ( $|\text{ratio}| > 2$ ,  $p < 0.05$ ) were selected for further identification.

### Identification of Protein Spots by MS

Protein spots were cut from gels and washed twice with Milli-Q water, destained with 50% acetonitrile (ACN) and 50 mM ammonium bicarbonate ( $\text{NH}_4\text{HCO}_3$ ), and dried under vacuum. Each spot was digested overnight in 20 ng/ $\mu\text{L}$  trypsin in 40 mM  $\text{NH}_4\text{HCO}_3$ . The peptides were extracted two times with 50% ACN and 5% TFA. The extracts were pooled and dried completely by centrifugal lyophilization. Then, 1  $\mu\text{L}$  of the mixture was loaded onto a target plate with 10 mg/mL CHCA matrix, dried at RT, and analyzed using Voyager DE STR MALDI-TOF (ABI, USA). All analyses were carried out in reflex positive ion mode at an accelerating voltage of 20 kV and a reflex voltage of 23 kV. The instrument was calibrated with external standards including P14R and Insulin Chain B Oxidized. Internal mass calibration was performed using trypsin auto-digestion products. The obtained peptide mass fingerprints (PMF) were submitted for identification using the Mascot search engine (Matrix Science, UK). Search parameters were set as follows: taxonomy human, cysteine acetylation, enzyme trypsin, one missed cleavage site, and a peptide tolerance of 100 ppm.

### Western Blot Analysis

Cells were harvested and homogenized for total protein extraction. Equivalent amounts of protein extracts were separated by SDS-PAGE and then transferred to nitrocellulose membranes (Amersham Biosciences, Buckinghamshire, UK). Rabbit anti-CCT2 (1:1000; ProteinTech Group Inc, Wuhan, China), anti-stathmin (1:500; ProteinTech Group Inc), and anti- $\beta$ -actin antibody (1:2000; Cell Signaling Technology, Beverly, MA, USA) were used as the primary antibodies and horseradish peroxidase conjugated goat anti-rabbit IgG (Thermo Scientific Pierce, Rockford, IL, USA) was used as the secondary antibody. Immunoreactive bands were detected using SuperSignal (R) West Femto Maximum Sensitivity Substrate (Thermo Scientific Pierce). The analysis was performed three times.

### Statistical Analysis

The data were analyzed and expressed as the mean  $\pm$  standard deviation. Statistical significance was evaluated by independent samples *t*-test using SPSS Statistics V21.0 software. Statistical significance was set at  $P < 0.05$ .

## Results

### Morphological Analyses

We compared DPSCs and CDPSCs at passage 3. Typical colonies of DPSCs and CDPSCs growing in 25  $\text{cm}^2$  culture flasks for two weeks were identified after seeding as single cell suspensions. Under light microscopy, both stem cell populations formed single colonies in culture. Both DPSCs (Figure 1A) and CDPSCs (Figure 1B) were spindle-shaped and fibroblast-like and the cellular nuclei were round or oval-shaped. The fine structure of both stem cells was studied using scanning electron microscopy. Both DPSCs (Figure 1C) and CDPSCs (Figure 1D) had a morphological homogeneous fibroblast-like appearance with long cytoplasmic processes and many filopodia.

### Cell Growth

The proliferation rates of DPSCs and CDPSCs were studied using the cell counting technique at passage 3. The data showed that the number of DPSCs was significantly lower than that of CDPSCs at days 3, 5, and 7, indicating that CDPSCs had a higher proliferative potential in comparison with DPSCs (\*\* $p < 0.01$ ) (Figure 1E).

### Multipotent Differentiation

To evaluate the multipotent differentiation capacity, both DPSCs and CDPSCs were treated with various differentiation-inducing media. Osteogenic differentiation was indicated by the detection of mineralized nodules in DPSCs (Figure 2A) and CDPSCs (Figure 2B) after 3 weeks of culture in mineralization medium. Following the induction of adipogenic differentiation, the accumulation of lipid-rich vacuoles in DPSCs (Figure 2C) and CDPSCs (Figure 2D) was visualized within cells by oil red O staining. The induction of chondrogenic differentiation was demonstrated by the accretion of sulfated matrix in DPSCs (Figure 2E) and CDPSCs (Figure 2F) stained with alcian blue.

### DPSCs and CDPSCs Proteome in Narrow pH Range (4–7)

To better understand the differentially expressed proteins of DPSCs and CDPSCs, we analyzed the DPSCs and CDPSCs by 2D-DIGE. Proteins were labeled with Cy3 or Cy5 fluorescent dye, and then the Cy3, Cy5 and Cy2 images were scanned and analyzed using DeCyder 5.0 software (Figure 3). Compared with DPSCs, 18 protein spots were differentially expressed in CDPSCs. Among them, 9 protein spots had increased expression while 9 had reduced expression in CDPSCs (Figure 4). The 18 protein spots were selected for further identification with MALDI-TOF MS. The pH 4–7 range analysis showed that CDPSCs presented a higher expression level of T-complex protein 1 subunit beta (CCT2), tropomyosin beta chain (TPM2), transaldolase (TALDO1), isocitrate dehydrogenase [NAD] subunit alpha, mitochondrial (IDH3A), F-actin-capping protein subunit beta (CAPZB), myosin regulatory light polypeptide 9 (MYL9), chloride intracellular channel protein 4 (CLIC4), glutaredoxin-3 (GLRX3), heat shock protein HSP 90-alpha (HSP90AA1) and DPSCs presented a higher expression level of TAR DNA-binding protein 43 (TARDBP), macrophage-capping protein (CAPG), stathmin (STMN1), acylamino-acid-releasing enzyme (APEH), heterogeneous nuclear ribonucleoprotein F (HNRNPF), keratin, type I cytoskeletal 9 (KRT9), keratin, type I cytoskeletal 10 (KRT10) (Table 1). All identified proteins were analyzed using the online GOfact interface (<http://61.50.138.118/gofact>). These proteins were potentially related to cell proliferation, differentiation, cell cytoskeleton and motility, and antioxidant function. They are widely distributed in the cytoplasm, nucleus, membrane and mitochondria (see support information, Table S1).

### Western Blot

We chose one upregulated protein and one downregulated protein in CDPSCs to compare with DPSCs. The interestingly selected identified proteins CCT2 and stathmin, which are closely correlated with cell proliferation and differentiation, were confirmed by western blot, the results demonstrated that CDPSCs had a higher expression of CCT2 and a lower expression of stathmin compared with DPSCs, which suggested that the proteomic analyses based on 2-D DIGE were convincing (Figure 5).

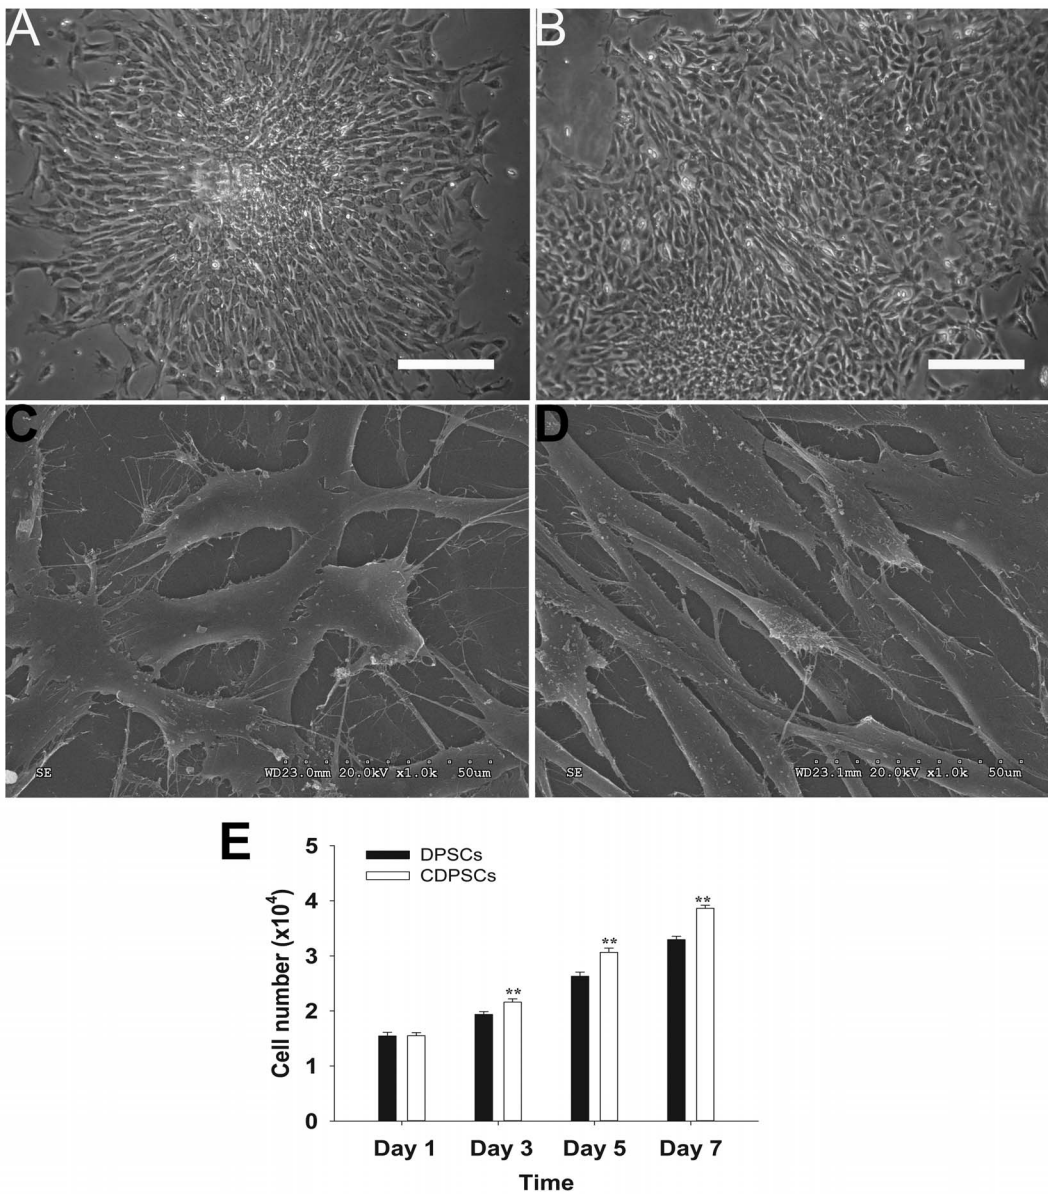

**Figure 1. Morphology and proliferative potential of DPSCs and CDPSCs.** Both DPSCs (A) and CDPSCs (B) isolated from dental pulp were spindle-shaped and fibroblast-like under the light microscope. Both DPSCs (C) and CDPSCs (D) have a fibroblast-like appearance with long cytoplasmic processes and many filopodia using the scanning electron microscope. (E) CDPSCs have a higher proliferative potential compared with DPSCs (\*\* $p < 0.01$ ). Scale bar = 100  $\mu\text{m}$ . Each experiment was repeated in triplicate. doi:10.1371/journal.pone.0097026.g001

## Discussion

Recent studies have reported that DPSCs are able to differentiate into various cell types or tissues including osteoblasts [3], odontoblasts [16], chondroblasts [3], [17], adipocytes [17], neuronal cells [18], endothelial cells [19], melanocytes [20] and cornea [21]. Among these, the most important function of DPSCs is forming odontoblasts, however; the mechanisms that are responsible for DPSCs migration, proliferation, and differentiation when the tooth encounters deep caries are poorly known.

Our study revealed that both DPSCs and CDPSCs had fibroblast-like morphology and were shown to be capable of differentiating into various cell types including osteoblasts, adipocytes and chondrocytes. Moreover, CDPSCs had a higher

proliferative potential than DPSCs, which was consistent with the previous study [9].

To better understand the molecular mechanisms underlying the changes in DPSCs encountering deep caries, we used 2D-DIGE to identify the proteins differentially expressed between DPSCs and CDPSCs. The comparative narrow range PH analysis showed that most differentially expressed proteins between the two stem cell populations are potentially related to cell proliferation, differentiation, cell cytoskeleton and motility, and antioxidative function. These differentially expressed proteins may contribute to the biological differences between CDPSCs and DPSCs.

A group of differentially expressed proteins are closely related to cell proliferation and differentiation including CCT2, stathmin and CLIC4. Chaperonin containing t-complex polypeptide 1 (CCT) is essential for maintaining cellular homeostasis by



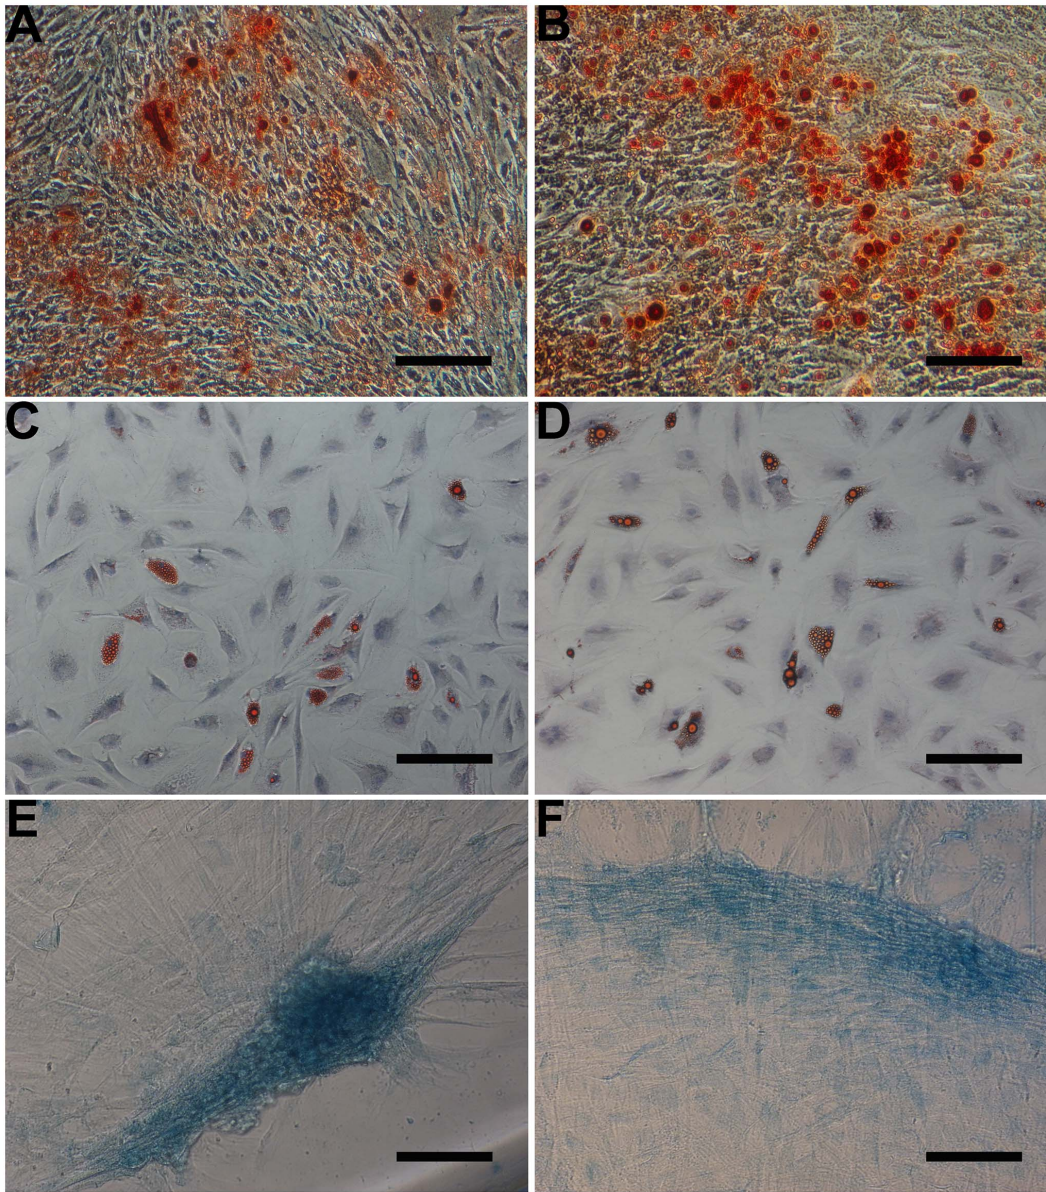

**Figure 2. Multilineage differentiation potential of DPSCs and CDPSCs.** Mineralization assay in DPSCs and CDPSCs. Mineralized nodules formed by DPSCs (A) and CDPSCs (B) were detected by alizarin red S staining after 3 weeks of culture in mineralized-induced media. Adipogenic differentiation, visualized by oil red O staining, showed lipid vacuoles in DPSCs (C) and CDPSCs (D). Chondrogenic differentiation was visualized by alcian blue staining of DPSCs (E) and CDPSCs (F), demonstrated by the accretion of sulfated matrix. Scale bar = 100  $\mu$ m. Each experiment was repeated 3 times.

doi:10.1371/journal.pone.0097026.g002

assisting the folding of many proteins such as cytoskeleton proteins, actin and tubulin. CCT is composed of eight different subunits (1, 2, 3, 4, 5, 6, 7, and 8) and their functions are poorly understood [22]. Previous studies showed that CCT2 expression was important for normal cell proliferation [23], [24]. Moreover, CCT2 is overexpressed in certain malignant tumors and its overexpression is closely correlated with poor prognosis [25]. CCT2 also involves in the regulation of the processes of cellular motion and neuronal differentiation [26], [27]. As CCT2 is a potential positive regulator of cell growth, the up-regulation of CCT2 in CDPSCs may be partly responsible for the observation that CDPSCs have a higher proliferation capacity compared with DPSCs.

CLIC4 is ubiquitously expressed in almost every cell type studied and is found in transmembranes and intramembranes. It is implicated in diverse cellular processes including membrane trafficking, cell proliferation, cell-cycle control, cell differentiation and morphogenesis [28], [29]. CLIC4 is essential for keratinocyte survival and is involved in the regulation of endothelial proliferation [29], [30]. It is closely related to adipocyte and keratinocyte differentiation [29], [31]. In addition, recent studies also provide evidence that the down-regulation of CLIC4 impairs angiogenesis and tubular morphogenesis [32]. CLIC4 is also shown to play a role in immune response of macrophages to LPS and in the host defense against bacterial infection [33]. As CLIC4 is a positive regulator of cell

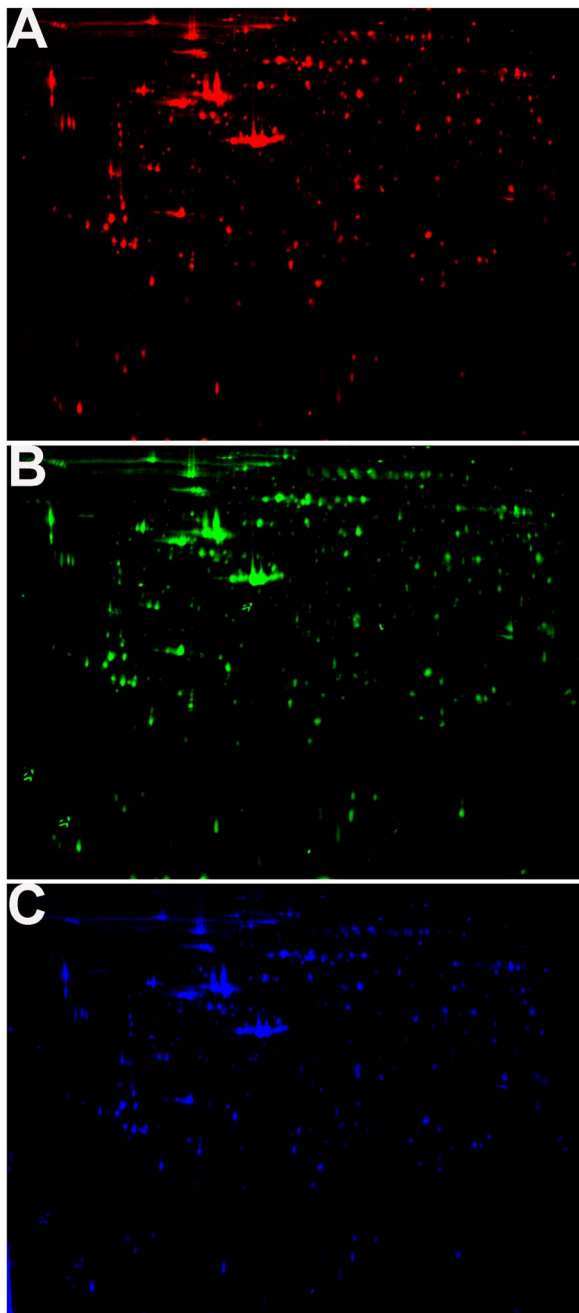

**Figure 3. 2D-DIGE of DPSCs and CDPSCs.** A Cy3 dye staining of CDPSCs B Cy5 dye staining of DPSCs. C Cy2-labeled internal standard proteome map.  
doi:10.1371/journal.pone.0097026.g003

proliferation, differentiation and host defense, microbial products produced by bacteria might enhance the expression of CLIC4 in CDPSCs in the case of deep caries. The up-regulation of CLIC4 might be accountable for the increased proliferation and osteogenic differentiation capacity of CDPSCs compared with DPSCs.

Stathmin is a ubiquitous cytosolic regulatory phosphorprotein and is involved in diverse intracellular signaling pathways including cell proliferation, cell-cycle regulation, differentiation, microtubule dynamics and activities [34], [35]. Up- and down regulation of stathmin has similar inhibitory effect on cell

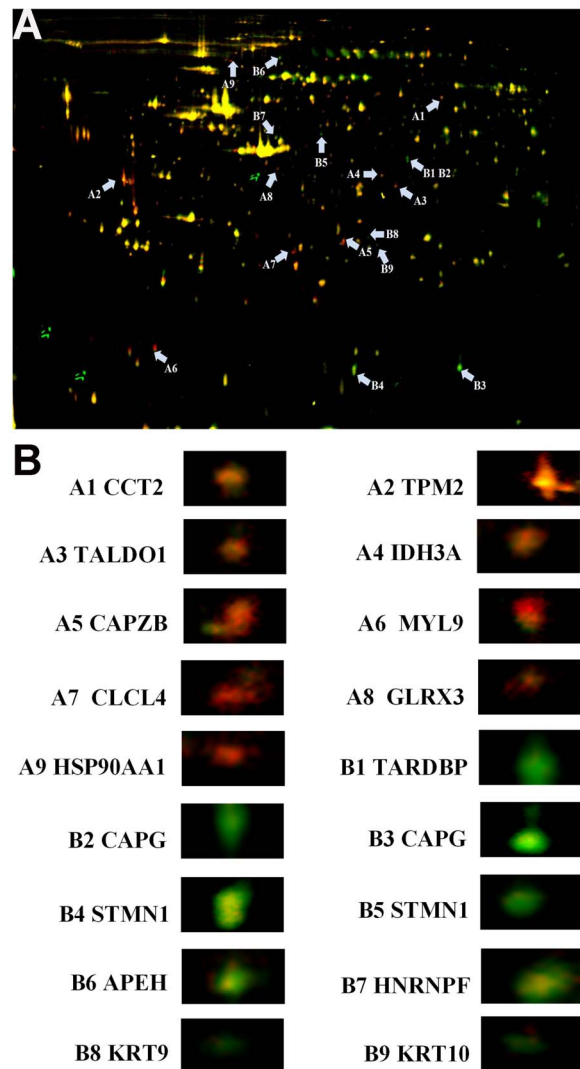

**Figure 4. Changes in protein expression between DPSCs and CDPSCs.** A The merge of Cy3, Cy5 and Cy2. Distribution of 18 differentially expressed protein spots in fluorescence difference gel electrophoresis gels. Protein spots are indicated (arrows). B Enlarged images of the differentially expressed protein spots in DIGE analysis.  
doi:10.1371/journal.pone.0097026.g004

proliferation by interfering with the formation and dynamics of mitotic spindles responsible for cell mitosis and the normal cell cycle [36]. Recent studies showed that stathmin promoted osteoblast differentiation and bone mass formation by interfering with microtubule assembly [35]. The expression level of stathmin diminishes in all cells detected so far as they become more terminally differentiated in culture [37]. CDPSCs under deep caries stimulation have greater osteogenic capacity compared with DPSCs, suggesting that CDPSCs might be more differentiated than DPSCs; thus, stathmin is expressed higher in DPSCs than in CDPSCs. The essential role of stathmin in regulating the cytoskeleton microtubules indicated that it may be required for the biological functions of DPSCs.

Another group of differentially expressed proteins is correlated with cell cytoskeleton and motility and includes TPM2, MYL9, CAPZB, CAPG, KRT9 and KRT10. Tropomyosins (TPM) are a family of actin-filament binding proteins expressed in most eukaryotic cells. In human, there are at least four TPM genes

**Table 1.** Differentiated expressed proteins between DPSCs and CDPSCs.

| Spot | Entry names | Protein names                                               | Accession No.(Swiss-Prot) | Theoretical MW/pi | Summary score |
|------|-------------|-------------------------------------------------------------|---------------------------|-------------------|---------------|
| A1   | CCT2        | T-complex protein 1 subunit beta                            | P78371                    | 57794/6.02        | 68            |
| A2   | TPM2        | Tropomyosin beta chain                                      | P07951                    | 32945/4.66        | 91            |
| A3   | TALDO1      | Transaldolase                                               | P37837                    | 37688/6.36        | 55            |
| A4   | IDH3A       | Isocitrate dehydrogenase [NAD] subunit alpha, mitochondrial | P50213                    | 40022/5.71        | 111           |
| A5   | CAPZB       | F-actin-capping protein subunit beta                        | P47756                    | 31616/5.36        | 148           |
| A6   | MYL9        | Myosin regulatory light polypeptide 9                       | P24844                    | 19871/4.78        | 108           |
| A7   | CLIC4       | Chloride intracellular channel protein 4                    | Q9Y696                    | 28982/5.45        | 128           |
| A8   | GLRX3       | Glutaredoxin-3                                              | O76003                    | 37693/5.31        | 87            |
| A9   | HSP90AA1    | Heat shock protein HSP 90-alpha                             | P07900                    | 85006/4.94        | 64            |
| B1   | TARDBP      | TAR DNA-binding protein 43                                  | Q13148                    | 44711/5.85        | 36            |
| B2   | CAPG        | Macrophage-capping protein                                  | P40121                    | 38494/5.82        | 29            |
| B3   | CAPG        | Macrophage-capping protein                                  | P40121                    | 38494/5.82        | 29            |
| B4   | STMN1       | Stathmin                                                    | P16949                    | 17292/5.76        | 83            |
| B5   | STMN1       | Stathmin                                                    | P16949                    | 17292/5.76        | 83            |
| B6   | APEH        | Acylamino-acid-releasing enzyme                             | P13798                    | 82142/5.29        | 85            |
| B7   | HNRNPF      | Heterogeneous nuclear ribonucleoprotein F                   | P52597                    | 45985/5.37        | 105           |
| B8   | KRT9        | Keratin, type I cytoskeletal 9                              | P35527                    | 62255/5.14        | 80            |
| B9   | KRT10       | Keratin, type I cytoskeletal 10                             | P13645                    | 59046/5.13        | 75            |

doi:10.1371/journal.pone.0097026.t001

(TPM1, TPM2, TPM3 and TPM4). TPM2 is found primarily in skeletal muscles and this protein helps regulate muscle contraction

by interacting with other muscle proteins, particularly myosin and actin [38]. In addition, TPM2 is essential for cytoskeleton

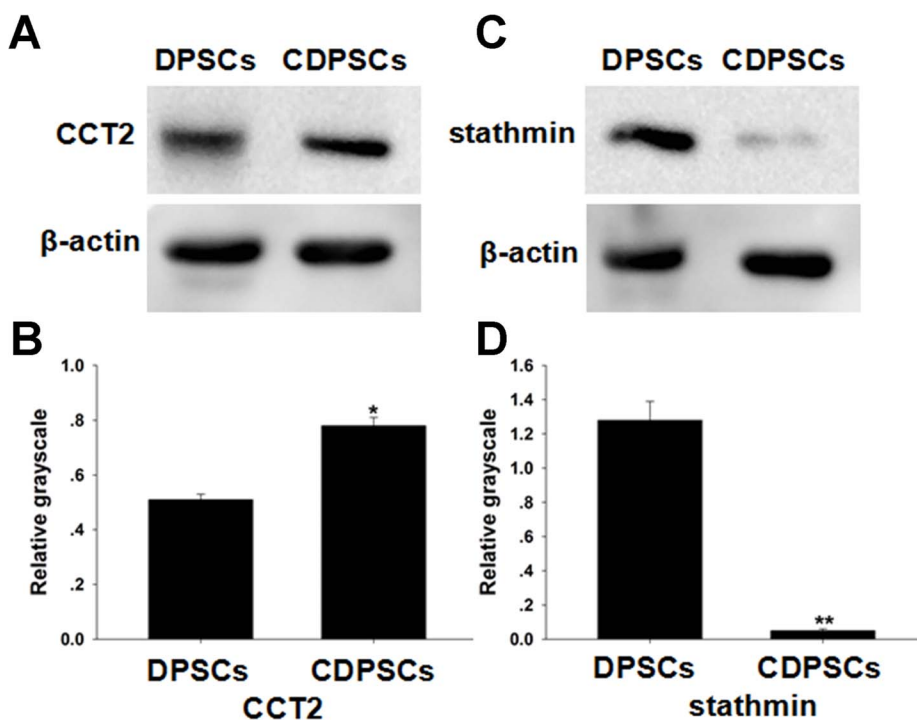



establishment and the regulation of TGF- $\beta$  induced stress fiber formation [39].

MYL9 can be phosphorylated by myosin light chain kinase in the presence of calcium and calmodulin. This phosphorylation contributes to the increase in the actin-activated ATPase activities of myosins. MYL9 is involved in the regulation of both smooth muscle and nonmuscle cell contractile activity via its phosphorylation [40]. Moreover, phosphorylation of MYL9 alters myocardium contraction by increasing the force and rate of force development [41].

CAPZB is a heterodimer with an  $\alpha$  subunit of 32–36 kDa and a  $\beta$  subunit of 28–32 kDa. The actin barbed end capping protein is highly conserved and found in nearly all eukaryotic cells [42]. CAPZB regulates the assembly of actin filament structures which are required for numerous biological processes and precise coordination.

CAPG is a member of the gelsolin-villin family, and it binds to actin in a calcium-dependent manner. CAPG is widely distributed in tissues and cells. Previous studies have shown that its function is closely correlated with the motility and ruffling of various cell types including macrophages, neutrophils, fibroblasts, and endothelial cells [43], [44], [45]. Recently, CAPG was reported to be an essential protein for the embedding and dendrite elongation processes in osteocytes [46].

KRT9, a type I intermediate filament protein, is abundant in human foot soles and palms. In mice, KRT9 is a major component of the perinuclear ring of manchette in spermatids and is required for normal sperm development [47], [48]. Mutation of KRT9 is responsible for human epidermolytic palmoplantar keratoderma and degenerative changes of keratin's intermediate filament structure [49].

KRT10, a type I keratin protein, is normally expressed in the suprabasal epidermal compartment. Deletion of KRT10 impairs permeability barrier function and stratum corneum hydration [50]. KRT10 is required for epidermal integrity, as KRT10 mutation leads to epidermolytic hyperkeratosis [51].

In this study, 3 identified proteins were mainly related to antioxidative function including TALDO1, GLRX3, and APEH. TALDO1 is an enzyme of the pentose phosphate pathway. TALDO1 deficiency has been implicated in a widening spectrum of diseases including male infertility, acetaminophen-induced acute liver failure, cirrhosis, hepatocellular carcinoma and autoimmunity diseases [52]. NADPH and GSH protect cells against oxidative stress. The effect of TALDO1 depletion on NADPH and GSH is discordant among various cells. Suppression of TALDO1 increases NADPH and GSH production and enhances oxidative stress in human Jurkat and H9 T cells, however; TALDO1 deficiency diminishes NADPH and GSH production in human lymphoblasts [53], [54], [55]. The up-regulation of TALDO1 in CDPSCs may increase NADPH and GSH expression, which may contribute to protecting CDPSCs from oxidative damage.

GLRX3, an essential [2Fe–2S]-binding protein, has been reported to play important roles in various signaling pathways including embryogenesis, immune cell response, the regulation of cardiac hypertrophy, cancer cell functions and iron homeostasis [56], [57], [58]. GLRX3 is necessary to protect cells against oxidative stress and GLRX3 deletion leads to embryonic lethality in mice [59], [60]. The pulp with deep caries is more likely to suffer from oxidative stress. The up-regulation of GLRX3 in CDPSCs may help protect them from being damaged by reactive oxygen species.

APEH belongs to the prolyl oligopeptidase family of serine proteases. Previous studies have showed that APEH contributes to

the elimination of the oxidized proteins in mammalian cells and in plants [61], [62]. APEH may be a potential regulator in sustaining the homeostasis of the cytoplasmic antioxidative system. The expression of APEH should be enhanced in CDPSCs, as dental pulp with deep caries is more susceptible to oxidized stress; however, our proteomic analysis showed opposite results. The antioxidative role of APEH in CDPSCs requires further investigation.

HSP90AA1 is a highly conserved and abundant protein. It has been implicated in the activation of various proteins such as important mediators of signal transduction, cell cycle regulation, differentiation and pathogenic factors involved in tumor progression [63]. Previous studies showed that HSP90AA1 played an important role in infectious disease by interacting with various bacterial and viral proteins [64], [65]. Moreover, HSP90AA1 is unregulated under elevated temperature [66]. Two reasons may be accountable for the up-regulation of HSP90AA1 in CDPSCs. First, the by-products secreted by bacteria and viruses might enhance the expression level of HSP90AA1 in stem cells isolated from dental pulp undergoing stimulation from a deep carious lesion. Moreover, the fluctuating oral temperature may increase HSP90AA1 expression in CDPSCs, as dental pulp with deep caries is more vulnerable to temperature stimuli without sufficient hard dental tissue protection.

Isocitrate dehydrogenase catalyzes the oxidative decarboxylation of isocitrate to form  $\alpha$ -ketoglutarate. This process is considered to be one of the key enzymes in the tricarboxylic acid (TCA) cycle. In mammals, there are three types of isoenzymes represented by cytosolic NADP-specific IDH (IDH1), mitochondrial NADP-specific IDH (IDH2), and mitochondrial NAD-specific IDH (IDH3) [67]. IDH3 is composed of three distinct types of subunits in the ratio 2 $\alpha$ :1 $\beta$ :1 $\gamma$  [68]. The function of the  $\alpha$  subunit sequence is highly conserved among the mammalian species. Moreover, it contains the isocitrate binding site and is indispensable for catalytic activity [69], [70].

TARDBP and HNRNPF are both important for gene regulation. TARDBP is normally concentrated in the nucleus but also shuttles between the nucleus and cytoplasm. TARDBP plays an important role in the regulation of splicing, microRNA processing, mRNA transport, stability, and translation. Recent studies showed that TARDBP knockdown inhibited neurite outgrowth and causes cell death [71]. TARDBP dysfunction has been linked to neurological disorders, such as amyotrophic lateral sclerosis (ALS), frontotemporal lobar dementia (FTLD) and Alzheimer's disease (AD) [72].

Heterogeneous nuclear ribonucleoprotein F (HNRNPF) is a member of the HNRNP family that is essential in splicing events. It plays a vital role in modulating gene expression at the transcriptional and posttranscriptional levels. Previous studies have showed that HNRNPF participates at various steps in processing cellular mRNA [73], [74], [75].

In conclusion, we revealed some candidate proteins that might be responsible for the biological differences between CDPSCs and DPSCs. The differently expressed proteins between DPSCs and CDPSCs are mostly involved in the regulation of cell proliferation, differentiation, cell cytoskeleton and motility. In addition, our results suggested that CDPSCs in dental pulp with deep caries have a higher level of expression of antioxidative proteins that may protect CDPSCs from oxidative stress. Further studies are warranted to elucidate the role of potential candidate proteins that may favor dental tissue regeneration.



## Supporting Information

**Table S1 The cellular distribution, molecular function and biological process of the differentiated expressed proteins.**  
(DOC)

## References

- Bluteau G, Luder HU, De Bari C, Mitsiadis TA (2008) Stem cells for tooth engineering. *Eur Cell Mater* 16: 1–9.
- Gronthos S, Mankani M, Brahimi J, Robey PG, Shi S (2000) Postnatal human dental pulp stem cells (DPSCs) in vitro and in vivo. *Proc Natl Acad Sci USA* 97: 13625–13630.
- Gronthos S, Brahimi J, Li W, Fisher LW, Cherman N, et al. (2002) Stem cell properties of human dental pulp stem cells. *J Dent Res* 81: 531–535.
- Miura M, Gronthos S, Zhao M, Lu B, Fisher LW, et al. (2003) SHED: stem cells from human exfoliated deciduous teeth. *Proc Natl Acad Sci USA* 100: 5807–5812.
- Sonoyama W, Liu Y, Fang D, Yamaza T, Seo BM, et al. (2006) Mesenchymal stem cell-mediated functional tooth regeneration in swine. *PLoS One* 1: e79.
- Morszeck C, Gotz W, Schierholz J, Zeilhofer F, Kuhn U, et al. (2005) Isolation of precursor cells (PCs) from human dental follicle of wisdom teeth. *Matrix Biol* 24: 155–165.
- Seo BM, Miura M, Gronthos S, Bartold PM, Batouli S, et al. (2004) Investigation of multipotent postnatal stem cells from human periodontal ligament. *Lancet* 364: 149–155.
- Ivanovski S, Gronthos S, Shi S, Bartold PM (2006) Stem cells in the periodontal ligament. *Oral Dis* 12: 358–363.
- Ma D, Gao J, Yue J, Yan W, Fang F, et al. (2012) Changes in proliferation and osteogenic differentiation of stem cells from deep caries in vitro. *J Endod* 38: 796–802.
- Çelebi B, Elçin AE, Elçin YM (2010) Proteomic analysis of rat bone marrow mesenchymal stem cell differentiation. *J Proteome Res* 9: 5217–5227.
- Choi MY, An YJ, Kim SH, Roh SH, Ju HK, et al. (2007) Mass spectrometry based proteomic analysis of human stem cells: a brief review. *Exp Mol Med* 39: 690–695.
- Eleuterio E, Trubiani O, Sulpizio M, Di Giuseppe F, Pierdomenico L, et al. (2013) Proteome of human stem cells from periodontal ligament and dental pulp. *PLoS One* 8: e71101.
- Mrozik KM, Zilm PS, Bagley CJ, Hack S, Hoffmann P, et al. (2010) Proteomic characterization of mesenchymal stem cell-like populations derived from ovine periodontal ligament, dental pulp, and bone marrow: analysis of differentially expressed proteins. *Stem Cells Dev* 19: 1485–1499.
- Patil R, Kumar BM, Lee WJ, Jeon RH, Jang SJ, et al. (2014) Multilineage potential and proteomic profiling of human dental stem cells derived from a single donor. *Exp Cell Res* 320: 92–107.
- Pivoriūnas A, Surovas A, Borutinskaitė V, Matuzevičius D, Treigyte G, et al. (2010) Proteomic analysis of stromal cells derived from the dental pulp of human exfoliated deciduous teeth. *Stem Cells Dev* 19: 1081–1093.
- Huang GT, Yamaza T, Shea LD, Djouad F, Kuhn NZ, et al. (2010) Stem/progenitor cell-mediated de novo regeneration of dental pulp with newly deposited continuous layer of dentin in an in vivo model. *Tissue Eng Part A* 16: 605–615.
- Struys T, Moreels M, Martens W, Donders R, Wolfs E, et al. (2010) Ultrastructural and immunocytochemical analysis of multilineage differentiated human dental pulp- and umbilical cord-derived mesenchymal stem cells. *Cells Tissues Organs* 193: 366–378.
- Arthur A, Rychkov G, Shi S, Koblar SA, Gronthos S (2008) Adult human dental pulp stem cells differentiate toward functionally active neurons under appropriate environmental cues. *Stem Cells* 26: 1787–1795.
- Bronckaers A, Hilkens P, Fanton Y, Struys T, Gervois P, et al. (2013) Angiogenic properties of human dental pulp stem cells. *PLoS One* 8: e71104.
- Stevens A, Zuliani T, Olejnik C, LeRoy H, Obriot H, et al. (2008) Human dental pulp stem cells differentiate into neural crest-derived melanocytes and have label-retaining and sphere-forming abilities. *Stem Cells Dev* 17: 1175–1184.
- Gomes JA, Galdes Monteiro B, Melo GB, Smith RL, Cavenaghi Pereira da Silva M, et al. (2010) Corneal reconstruction with tissue-engineered cell sheets composed of human immature dental pulp stem cells. *Invest Ophthalmol Vis Sci* 51: 1408–1414.
- Lin YF, Tsai WP, Liu HG, Liang PH (2009) Intracellular beta-tubulin/chaperonin containing TCP1-beta complex serves as a novel chemotherapeutic target against drug-resistant tumors. *Cancer Res* 69: 6879–6888.
- Grantham J, Brackley KI, Willison KR (2006) Substantial CCT activity is required for cell cycle progression and cytoskeletal organization in mammalian cells. *Exp Cell Res* 312: 2309–2324.
- Abe Y, Yoon SO, Kubota K, Mendoza MC, Gygi SP, et al. (2009) p90 ribosomal S6 kinase and p70 ribosomal S6 kinase link phosphorylation of the eukaryotic chaperonin containing TCP-1 to growth factor, insulin, and nutrient signaling. *J Biol Chem* 284: 14939–14948.

## Author Contributions

Conceived and designed the experiments: BW DM LC. Performed the experiments: DM LC JG WY YL SX. Analyzed the data: DM LC JG WY YL SX. Contributed reagents/materials/analysis tools: BW JG WY. Wrote the paper: LC DM BW.

- Coghlin C, Carpenter B, Dundas SR, Lawrie LC, Telfer C, et al. (2006) Characterization and over-expression of chaperonin t-complex proteins in colorectal cancer. *J Pathol* 210: 351–357.
- Chen JS, Chang LC, Wu CC, Yeung LK, Lin YF (2011) Involvement of F-actin in chaperonin-containing t-complex 1 beta regulating mouse mesangial cell functions in a glucose-induction cell model. *Exp Diabetes Res* 2011: 565647.
- Kubota H (2002) Function and regulation of cytosolic molecular chaperone CCT. *Vitam Horm* 65: 313–331.
- Tung JJ, Hobert O, Berryman M, Kitajewski J (2009) Chloride intracellular channel 4 is involved in endothelial proliferation and morphogenesis in vitro. *Angiogenesis* 12: 209–220.
- Suh KS, Mutoh M, Mutoh T, Li L, Ryscavage A, et al. (2007) CLIC4 mediates and is required for Ca<sup>2+</sup>-induced keratinocyte differentiation. *J Cell Sci* 120: 2631–2640.
- Fernández-Salas E, Suh KS, Speransky VV, Bowers WL, Levy JM, et al. (2002) mtCLIC/CLIC4, an organellar chloride channel protein, is increased by DNA damage and participates in the apoptotic response to p53. *Mol Cell Biol* 22: 3610–3620.
- Kitamura A, Nishizuka M, Tominaga K, Tsuchiya T, Nishihara T, et al. (2001) Expression of p68 RNA helicase is closely related to the early stage of adipocyte differentiation of mouse 3T3-L1 cells. *Biochem Biophys Res Commun* 287: 435–439.
- Bohman S, Matsumoto T, Suh K, Dimberg A, Jakobsson L, et al. (2005) Proteomic analysis of vascular endothelial growth factor-induced endothelial cell differentiation reveals a role for chloride intracellular channel 4 (CLIC4) in tubular morphogenesis. *J Biol Chem* 280: 42397–42404.
- He G, Ma Y, Chou SY, Li H, Yang C, et al. (2011) Role of CLIC4 in the host innate responses to bacterial lipopolysaccharide. *Eur J Immunol* 41: 1221–1230.
- Rubin CI, Atweh GF (2004) The role of stathmin in the regulation of the cell cycle. *J Cell Biochem* 93: 242–250.
- Liu H, Zhang R, Ko SY, Oyajobi BO, Papisian CJ, et al. (2011) Microtubule assembly affects bone mass by regulating both osteoblast and osteoclast functions: stathmin deficiency produces an osteopenic phenotype in mice. *J Bone Miner Res* 26: 2052–2067.
- Zhang Y, Xiong J, Wang J, Shi X, Bao G, et al. (2008) Regulation of melanocyte apoptosis by Stathmin 1 expression. *BMB Rep* 41: 765–770.
- Hummert TW, Schwartz Z, Sylvia VL, Dean DD, Boyan BD (2001) Stathmin levels in growth plate chondrocytes are modulated by vitamin D3 metabolites and transforming growth factor-beta1 and are associated with proliferation. *Endocrine* 15: 93–101.
- Martilla M, Lemola E, Wallefeld W, Memo M, Donner K, et al. (2012) Abnormal actin binding of aberrant  $\beta$ -tropomyosins is a molecular cause of muscle weakness in TPM2-related nemaline and cap myopathy. *Biochem J* 442: 231–239.
- Bakin AV, Safina A, Rinehart C, Daroqui C, Darbary H, et al. (2004) A critical role of tropomyosins in TGF-beta regulation of the actin cytoskeleton and cell motility in epithelial cells. *Mol Biol Cell* 15: 4682–4694.
- Totsukawa G, Yamakita Y, Yamashiro S, Hartshorne DJ, Sasaki Y, et al. (2000) Distinct roles of ROCK (Rho-kinase) and MLCK in spatial regulation of MLC phosphorylation for assembly of stress fibers and focal adhesions in 3T3 fibroblasts. *J Cell Biol* 150: 797–806.
- Olsson MC, Patel JR, Fitzsimons DP, Walker JW, Moss RL (2004) Basal myosin light chain phosphorylation is a determinant of Ca<sup>2+</sup> sensitivity of force and activation dependence of the kinetics of myocardial force development. *Am J Physiol Heart Circ Physiol* 287: 2712–2718.
- Cooper JA, Sept D (2008) New insights into mechanism and regulation of actin capping protein. *Int Rev Cell Mol Biol* 267: 183–206.
- Southwick FS, DiNubile MJ (1986) Rabbit alveolar macrophages contain a Ca<sup>2+</sup>-sensitive, 41,000-dalton protein which reversibly blocks the “barbed” ends of actin filaments but does not sever them. *J Biol Chem* 261: 14191–14195.
- Sun HQ, Kwiatkowska K, Wooten DC, Yin HL (1995) Effects of CapG overexpression on agonist-induced motility and second messenger generation. *J Cell Biol* 129: 147–156.
- Witke W, Li W, Kwiatkowski DJ, Southwick FS (2001) Comparisons of CapG and gelsolin-null macrophages: demonstration of a unique role for CapG in receptor-mediated ruffling, phagocytosis, and vesicle rocketing. *J Cell Biol* 154: 775–784.
- Guo D, Keightley A, Guthrie J, Veno PA, Harris SE, et al. (2010) Identification of osteocyte-selective proteins. *Proteomics* 10: 3688–3698.
- Mochida K, Rivkin E, Gil M, Kierszenbaum AL (2000) Keratin 9 is a component of the perinuclear ring of the manchette of rat spermatids. *Dev Biol* 227: 510–519.

48. Rivkin E, Eddy EM, Willis WD, Goulding EH, Suganuma R, et al. (2005) Sperm tail abnormalities in mutant mice with neo(r) gene insertion into an intron of the keratin 9 gene. *Mol Reprod Dev* 72: 259–271.
49. Kobayashi S, Tanaka T, Matsuyoshi N, Imamura S (1996) Keratin 9 point mutation in the pedigree of epidermolytic hereditary palmoplantar keratoderma perturbs keratin intermediate filament network formation. *FEBS Lett* 386: 149–155.
50. Jensen JM, Schütze S, Neumann C, Proksch E (2000) Impaired cutaneous permeability barrier function, skin hydration, and sphingomyelinase activity in keratin 10 deficient mice. *J Invest Dermatol* 115: 708–713.
51. Sun XK, Ma LL, Xie YQ, Zhu XJ (2002) Keratin 1 and keratin 10 mutations causing epidermolytic hyperkeratosis in Chinese patients. *J Dermatol Sci* 29: 195–200.
52. Perl A, Hanczko R, Telarico T, Oaks Z, Landas S (2011) Oxidative stress, inflammation and carcinogenesis are controlled through the pentose phosphate pathway by transaldolase. *Trends Mol Med* 17: 395–403.
53. Banki K, Hutter E, Colombo E, Gonchoroff NJ, Perl A (1996) Glutathione levels and sensitivity to apoptosis are regulated by changes in transaldolase expression. *J Biol Chem* 271: 32994–33001.
54. Banki K, Hutter E, Gonchoroff NJ, Perl A (1998) Molecular ordering in HIV-induced apoptosis. Oxidative stress, activation of caspases, and cell survival are regulated by transaldolase. *J Biol Chem* 273: 11944–11953.
55. Qian Y, Banerjee S, Grossman CE, Amidon W, Nagy G, et al. (2008) Transaldolase deficiency influences the pentose phosphate pathway, mitochondrial homeostasis and apoptosis signal processing. *Biochem J* 415: 123–134.
56. Haunhorst P, Berndt C, Eitner S, Godoy JR, Lillig CH (2010) Characterization of the human monothiol glutaredoxin 3 (PICOT) as iron-sulfur protein. *Biochem Biophys Res Commun* 394: 372–376.
57. Cha MK, Kim IH (2009) Preferential overexpression of glutaredoxin3 in human colon and lung carcinoma. *Cancer Epidemiol* 33: 281–287.
58. Haunhorst P, Hanschmann EM, Bräutigam L, Stehling O, Hoffmann B, et al. (2013) Crucial function of vertebrate glutaredoxin 3 (PICOT) in iron homeostasis and hemoglobin maturation. *Mol Biol Cell* 24: 1895–1903.
59. Cha H, Kim JM, Oh JG, Jeong MH, Park CS, et al. (2008) PICOT is a critical regulator of cardiac hypertrophy and cardiomyocyte contractility. *J Mol Cell Cardiol* 45: 796–803.
60. Pujol-Carrion N, Belli G, Herrero E, Nogues A, de la Torre-Ruiz MA (2006) Glutaredoxins Grx3 and Grx4 regulate nuclear localisation of Aft1 and the oxidative stress response in *Saccharomyces cerevisiae*. *J Cell Sci* 119: 4554–4564.
61. Nakai A, Yamauchi Y, Sumi S, Tanaka K (2012) Role of acylamino acid-releasing enzyme/oxidized protein hydrolase in sustaining homeostasis of the cytoplasmic antioxidative system. *Planta* 236: 427–436.
62. Shimizu K, Fujino T, Ando K, Hayakawa M, Yasuda H, et al. (2003) Overexpression of oxidized protein hydrolase protects COS-7 cells from oxidative stress-induced inhibition of cell growth and survival. *BBRC* 304: 766–771.
63. Luo D, Bu Y, Ma J, Rajput S, He Y, et al. (2013) Heat Shock Protein 90- $\alpha$  mediates Aldo-Keto reductase 1B10 (AKR1B10) protein secretion through secretory lysosomes. *J Biol Chem* 288: 36733–36740.
64. Jin S, Song YC, Emili A, Sherman PM, Chan VL (2003) JlpA of *Campylobacter jejuni* interacts with surface-exposed heat shock protein 90 $\alpha$  and triggers signalling pathways leading to the activation of NF- $\kappa$ B and p38 MAP kinase in epithelial cells. *Cell Microbiol* 5: 165–174.
65. Reyes-Del Valle J, Chávez-Salinas S, Medina F, Del Angel RM (2005) Heat shock protein 90 and heat shock protein 70 are components of dengue virus receptor complex in human cells. *J Virol* 79: 4557–4567.
66. Krone PH, Sass JB (1994) HSP 90 alpha and HSP 90 beta genes are present in the zebrafish and are differentially regulated in developing embryos. *Biochem Biophys Res Commun* 204: 746–752.
67. Huh TL, Kim YO, Oh IU, Song BJ, Inazawa J (1996) Assignment of the human mitochondrial NAD<sup>+</sup>-specific isocitrate dehydrogenase alpha subunit (IDH3A) gene to 15q25.1→q25.2 by in situ hybridization. *Genomics* 32: 295–296.
68. Huang YC, Colman RF (1990) Subunit location and sequences of the cysteinyl peptides of pig heart NAD-dependent isocitrate dehydrogenase. *Biochemistry* 29: 8266–8273.
69. Kim YO, Oh IU, Park HS, Jeng J, Song BJ, et al. (1995) Characterization of a cDNA clone for human NAD<sup>+</sup>-specific isocitrate dehydrogenase alpha-subunit and structural comparison with its isoenzymes from different species. *Biochem J* 308: 63–68.
70. Soundar S, O'hagan M, Fomulu KS, Colman RF (2006) Identification of Mn<sup>2+</sup>-binding aspartates from alpha, beta, and gamma subunits of human NAD-dependent isocitrate dehydrogenase. *J Biol Chem* 281: 21073–21081.
71. Iguchi Y, Katsuno M, Niwa J, Yamada S, Sone J, et al. (2009) TDP-43 depletion induces neuronal cell damage through dysregulation of Rho family GTPases. *J Biol Chem* 284: 22059–22066.
72. Youmans KL, Wolozin B (2012) TDP-43: a new player on the AD field? *Exp Neurol* 237: 90–95.
73. Min H, Chan RC, Black DL (1995) The generally expressed hnRNP F is involved in a neural-specific pre-mRNA splicing event. *Genes Dev* 9: 2659–2671.
74. Chen CD, Kobayashi R, Helfman DM (1999) Binding of hnRNP H to an exonic splicing silencer is involved in the regulation of alternative splicing of the rat beta-tropomyosin gene. *Genes Dev* 13: 593–606.
75. Wei CC, Guo DF, Zhang SL, Ingelfinger JR, Chan JS (2005) Heterogeneous nuclear ribonucleoprotein F modulates angiotensinogen gene expression in rat kidney proximal tubular cells. *J Am Soc Nephrol* 16: 616–628.
